# Supplementary material for: Interaction between carbon metabolism and phosphate accumulation is revealed by a mutation of a cellulose synthase-like protein, CSLF6
Source: PubMed Central journal article supplement (PMC4986868; doi:10.1093/jxb/erv050), 2015-03-04
Supplement: supp_erv050_jexbot141499_file001.pdf [file supp_erv050_jexbot141499_file001.pdf]

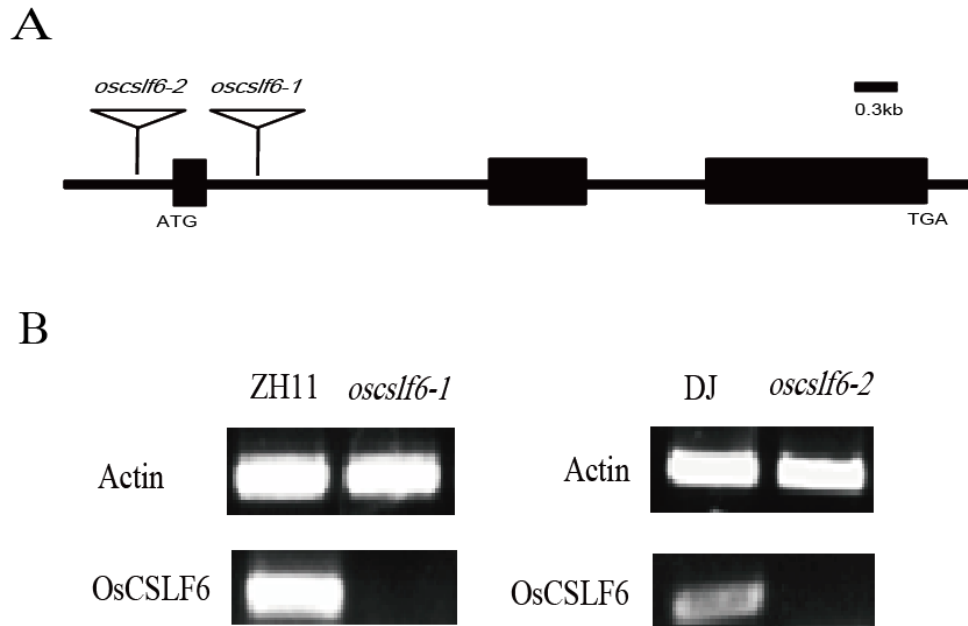

Figure S1. Molecular features of *OsCSLF6*. (A) Structure of *OsCSLF6* and T-DNA insertion site. Three exons (filled boxes) and two introns (lines between the filled boxes) are shown. T-DNA insertion sites of *oscslf6-1* and *oscslf6-2* were located in the first intron and 204bp upstream of ATG. (B) RT-PCR analyses of *OsCSLF6* expression levels in the ZH11, *oscslf6-1*, DJ, *oscslf6-2* plants. Total RNA was extracted from 9-d-seedling. Actin was used as a control.

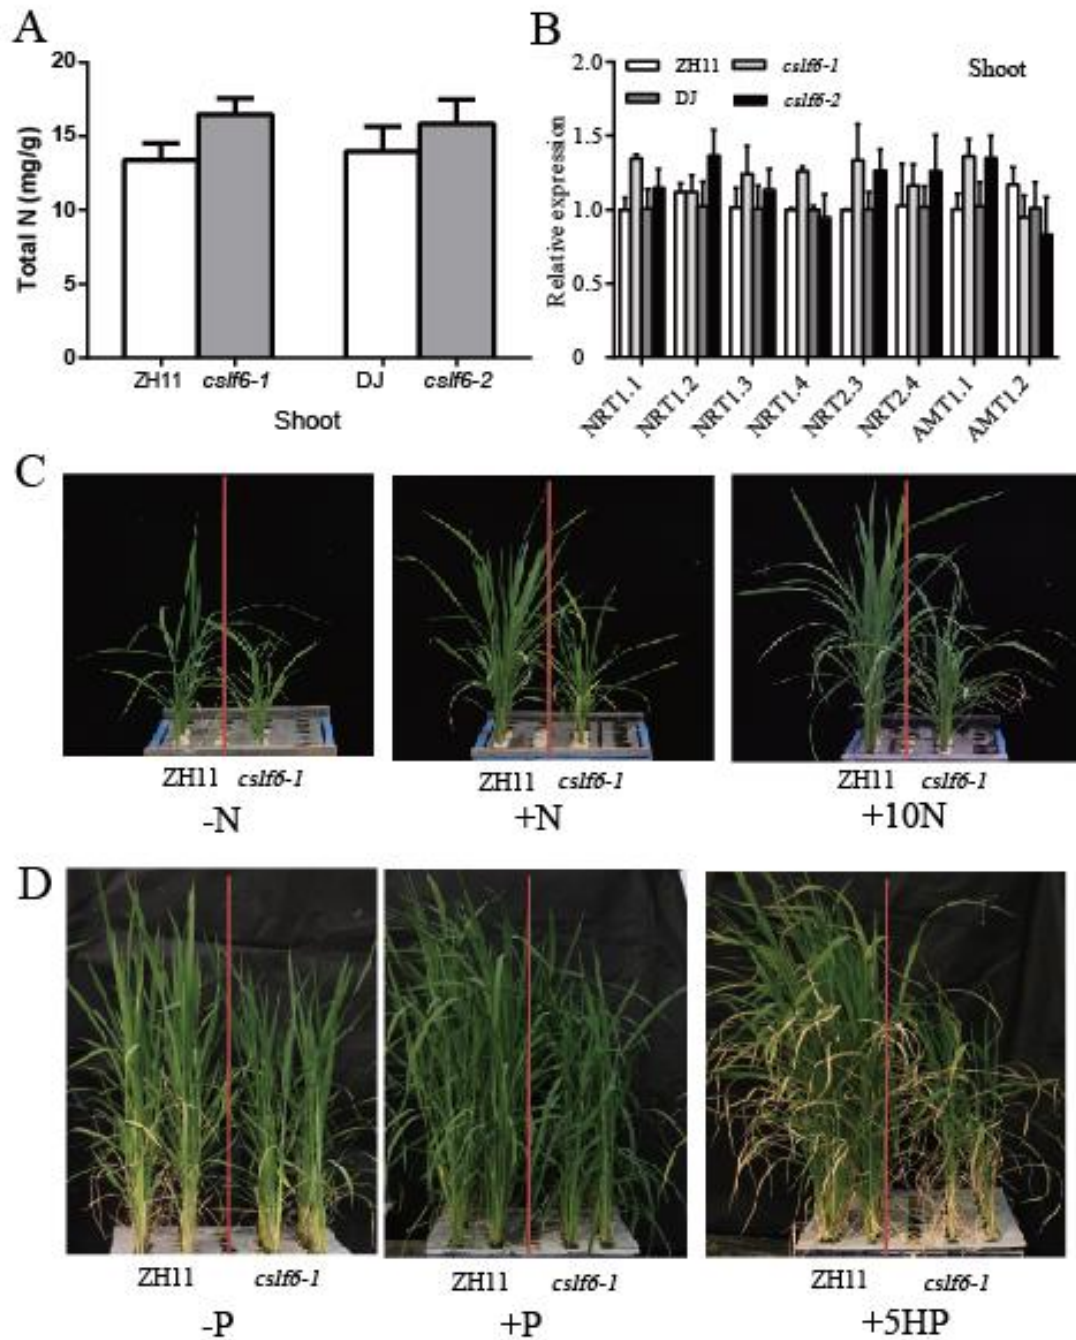

Figure S2. Phenotypes of *oscslf-1* mutants under different N conditions. (A) Shoot total N content in ZH11 and *oscslf-1* mutant plants. (B) Expression of Nitrogen related transporter genes in shoots of ZH11 and *oscslf-1* mutant plants. Error bars indicate SD (n=3). (C) Phenotypes of ZH11 and *oscslf-1* mutant plants under -N (no N), +N (1.25 mM) and +10N (12.5 mM  $\text{NH}_4\text{NO}_3$ ) conditions. (D) Phenotypes of ZH11 and *oscslf-1* mutant plants under -Pi (no Pi), +P (0.32 mM) and +5 Pi (1.6 mM  $\text{NaH}_2\text{PO}_4$ ) condition.

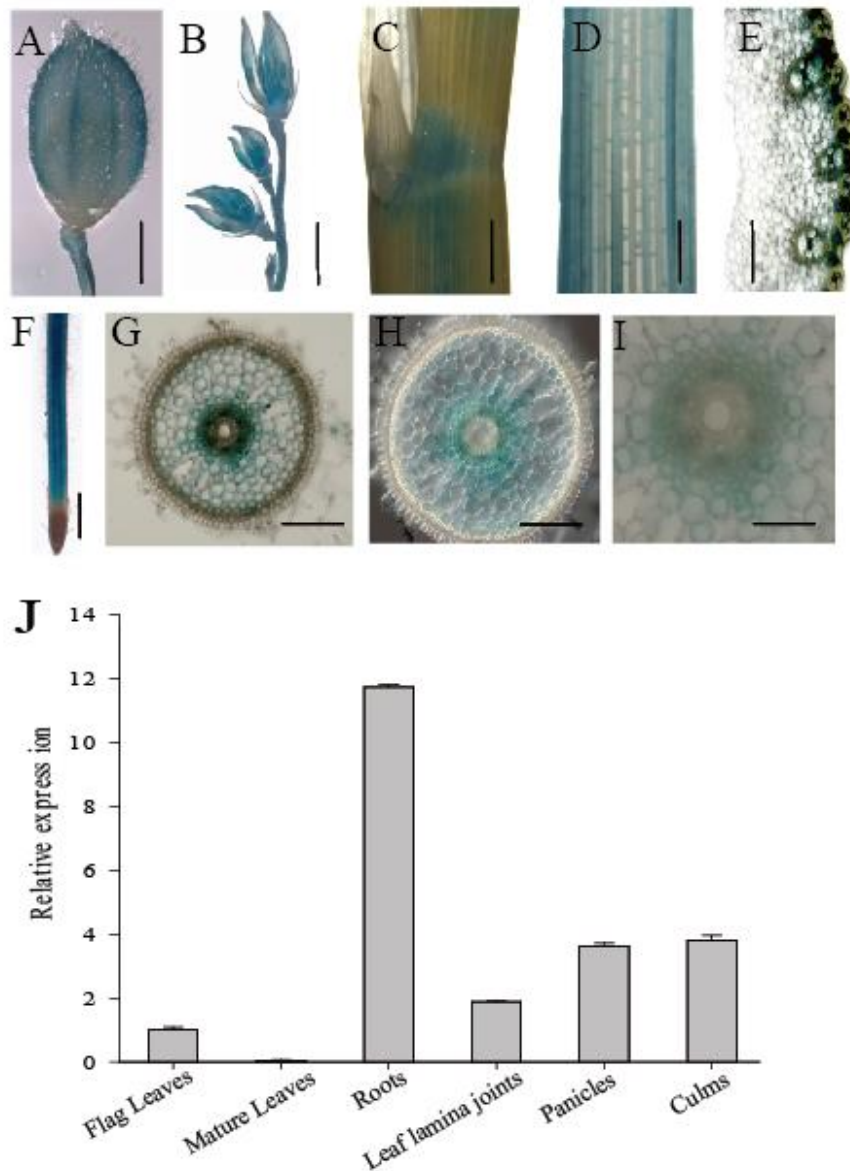

Figure S3. *OsCSLF6* expression profile. (A–F) GUS staining of *OsCSLF6* PRO::GUS transgenic plant: Grain husks (A); young panicles (B); Leaf lamina joints (C); Culms (D); Cross-section of culms (E); Roots (F). (G–I) Cross-section of roots. Bars=2 mm (A–B, D), 4 mm (C), 1 mm (F–G), 500  $\mu$ m (H), 300  $\mu$ m (E, I). (J) Relative *OsCSLF6* expression levels in the Flag leaves, Leaves, Roots, Leaf lamina joints, panicles, and culms. Error bars indicate SD (n=3).

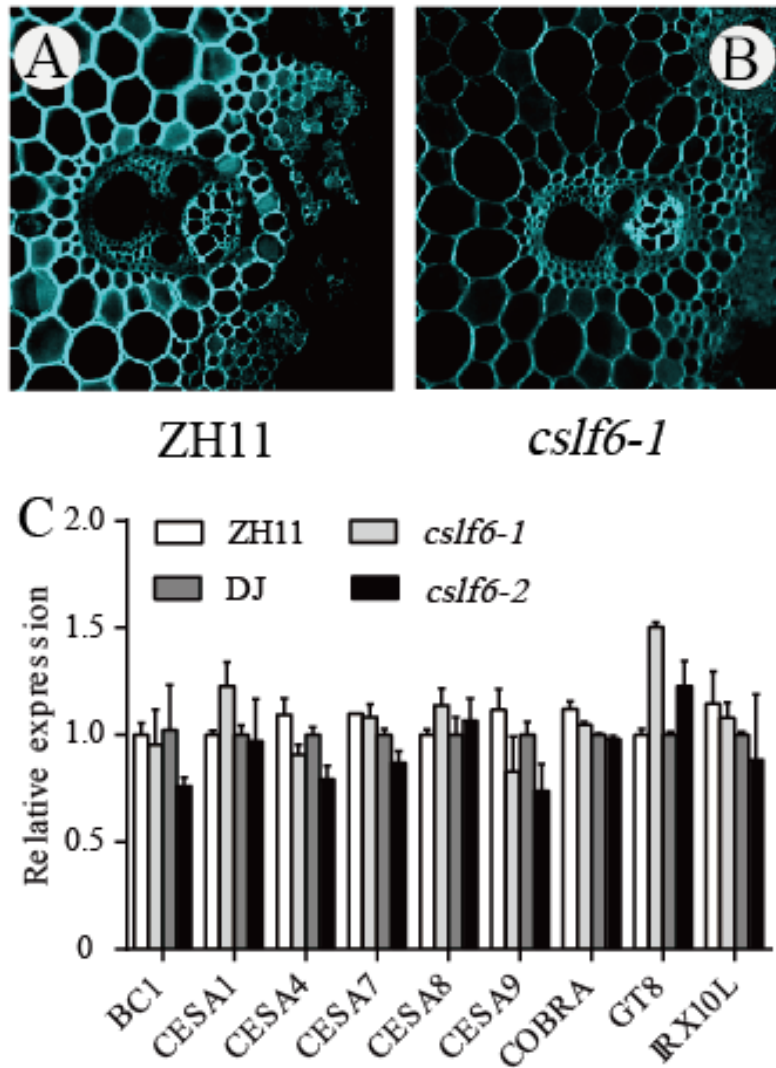

Figure S4. Cellulose staining in transverse culms sections of ZH11 (A) and *osclsf6-1* (B) plants. (C) Expression of cell wall synthesis related genes of ZH11, *osclsf6-1*, DJ and *osclsf6-2* mutant plants. Error bars indicate SD (n=3).

**Table S1. Primers used in this study**

| Primer name            | Forward primer (5'–3')      | Reverse primer (5'–3')        |
|------------------------|-----------------------------|-------------------------------|
| CSLF6,<br>Promoter-Gus | attB1-CAATCCCTTTCGGGTTGGTTG | attB2-CATTGCTAATGCCTTTGCCTCTC |
| CSLF6, RT-PCR          | CATCATCATCCTCGTCAACATC      | GGTGAAGTCGTA CTTCTTGGTG       |
| Actin                  | TTCCTACATCGCCCTGGACT        | AGCCTTGGCAATCCACATCT          |

**Table S2. Primers for real-time PCR analysis**

| Gene             | Forward primer (5'–3')       | Reverse primer (5'–3')             |
|------------------|------------------------------|------------------------------------|
| <i>OsIPS1</i>    | CTAAGGTAGGGCAACTTGTATC       | TTATTAGAGCAAGGACCGAAAC             |
| <i>OsPHO2</i>    | TTTTACACAAGCCACCAAAGC        | TCACGAGCATGTCCAACAA                |
| <i>OsCSLF6</i>   | CGCTACTGCTCCATCTACCC         | GGCACGGTGGTGTAGAAGAT               |
| <i>OsPT1</i>     | CGCTCCGTACGAGTGGTAGT         | GGTCTTTCAAATCCAGGGAAA              |
| <i>OsPT2</i>     | GACGAGACCGCCCAAGAAG          | TTTCAGTCACTCACGTCGAGAC             |
| <i>OsPT4</i>     | TTCTGCTAGTGTACCAAACAAAATTACA | CTAAGTGGCATTATAATATCAACAGTA<br>ACC |
| <i>OsPT6</i>     | CCGCCCCGCAAACCTGTA           | CAACTGGCGGTTTCTTCGAT               |
| <i>OsPT8</i>     | AGAAGGCAAAAGAAATGTGTGTTAAAT  | AAAATGTATTCGTGCCAAATTGCT           |
| <i>OsBC1</i>     | ACCCCAACCTCAACAACGTCA        | AACATGCCGGTGTGCTTGAT               |
| <i>OsCESA1</i>   | TTGACTTGCACGATCGATACG        | TCCCACATAAACTGGACCCTG              |
| <i>OsCESA4</i>   | GTTCGATGGCATTGATCGCA         | CCACATAAACCGGACCTTGGA              |
| <i>OsCESA7</i>   | CCGGATGGATGATTCTTGTTG        | CCCCAAAACACTTTTATCCC               |
| <i>OsCESA9</i>   | AGGCCATCCATGTCATCAGCT        | TTGAACCCCGTTAGGATGTCC              |
| <i>OsCOBRA</i>   | ACGATTTGCTCATGCAAGCTGGTC     | TCCGGAGGTGGCATGACACAATTA           |
| <i>OsGT8</i>     | AGATTGATTTCGTTAGGCTTC        | AAATGAAACCTTTATCCTATCCA            |
| <i>OsGUX1L</i>   | ACTGTAACCTGGAATAACC          | AAGACAATAGTGCTGAAG                 |
| <i>OsNRT1.1</i>  | CGAGGTTGGTGCATTTTGTG         | GCCGTGGTGTCTCTTTTTTTT              |
| <i>OsNRT1.2</i>  | CAATCTGTAATGCAGGGTAACTGTT    | AGCATCCTCAAGACCACAAA               |
| <i>OsNRT1.3</i>  | GAGGTTTGGGTTTTTGGAGTAGTG     | CAGGAGATTGAAGCTAGCATCATATC         |
| <i>OsNRT1.4</i>  | AATGATCCCTGATTAGGTCAAGTCA    | CCAAATACCACTACTCTTGCATCCT          |
| <i>OsNRT2.3</i>  | ACGGAGACCGGGATCAAGTA         | CCCCTGCGGGAAGTAGATG                |
| <i>OsNRT2.4</i>  | ACGAAGCTGGTGGAGAAGAAG        | ACGACGCCATCGCCATA                  |
| <i>OSAMT1.1</i>  | TCTCTTCTACGGGCTCAAGAAGC      | CAAATTTATGACGTGACGATCGAGA          |
| <i>OSAMT1.2</i>  | GATCTACGGCGAGTCGGGCACGA      | TTCCATCTCTGTGAGGTCGAGACG           |
| <i>Ubiquitin</i> | AACCAGCTGAGGCCCAAGA          | ACGATTGATTTAACCAGTCCATGA           |
